# Supplementary material for: Atomic thermodynamics and microkinetics of the reduction mechanism of electrolyte additives to facilitate the formation of solid electrolyte interphases in lithium-ion batteries
Source: Royal Society of Chemistry journal article supplement (doi:10.1039/d0ra01412e), 2020-01-01
Supplement: d0ra01412e1.pdf [file d0ra01412e1.pdf]

# Atomic Thermodynamics and Microkinetics of Reduction Mechanism of CMDO as an Electrolyte Additive for Facilitating Solid Electrolyte Interphase of Lithium Ion Battery

Xiao Liu,<sup>a</sup> Jianhua Zhou<sup>a</sup>, Zhen Xu<sup>a\*</sup>, Yixuan Wang<sup>b,a\*</sup>

<sup>a</sup> School of Chemical and Pharmaceutical Engineering, Qilu University of Technology (Shandong Academy of Sciences), Jinan 250010, PR China

<sup>b</sup> Computational Chemistry Laboratory, Department of Chemistry and Forensic Sciences, Albany State University, Albany, GA31705, US

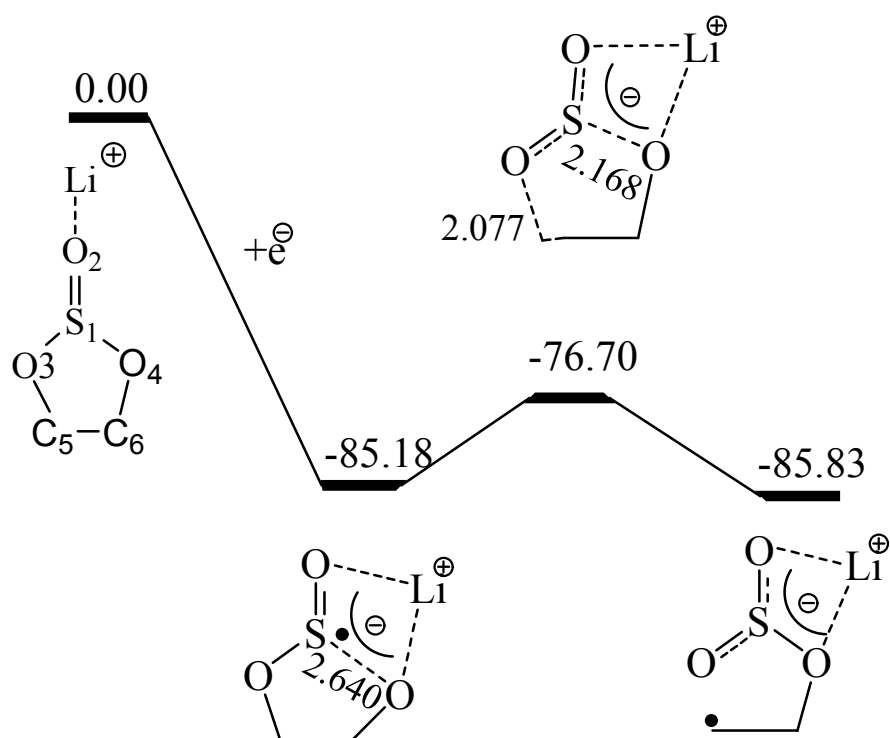

Figure S1. Gibbs free energy profile of  $\text{Li}^+(\text{ES})$  with SMD-B3PW91/6311++G(d,p)

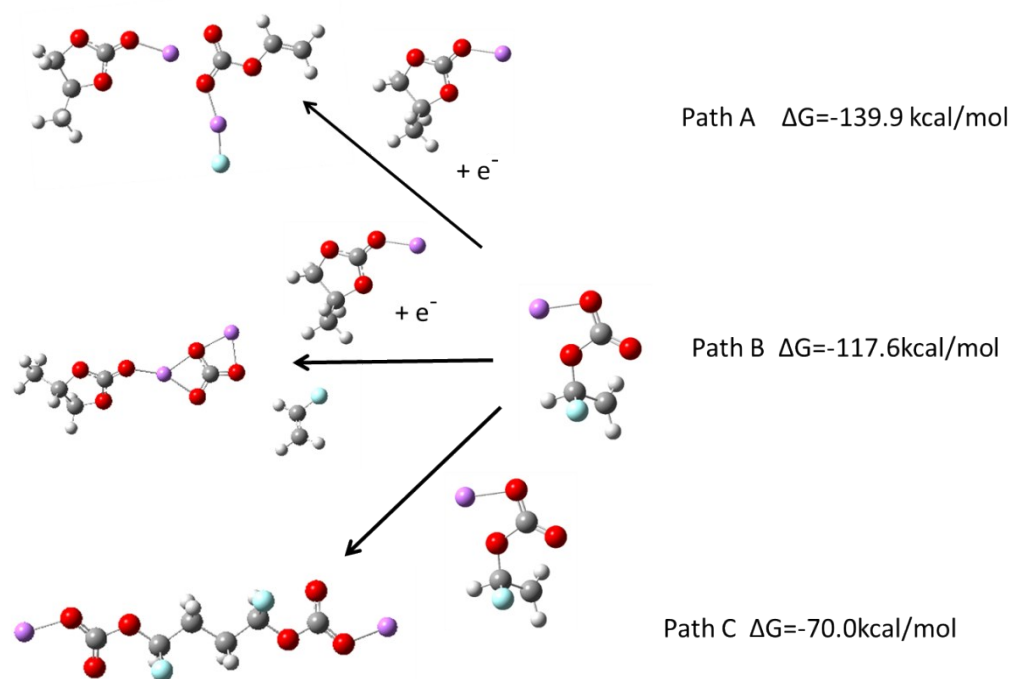

Figure S2. Termination reaction of the opening radical of reduced  $\text{Li}^+(\text{FC})$
